# Supplementary material
Source: PubMed Central journal article supplement (PMC3189541)
Supplement: NIHMS36289-supplement-5.pdf [file NIHMS36289-supplement-5.pdf]

**Supplementary Table 1:** Analysis of microarray-derived gene expression<sup>1,2</sup> for transcripts encoded within the 5 haplotype blocks (1-5, physical position on chromosome 3 shown in first column). Fold changes in expression with reference to WKY data are shown along with Bonferroni-corrected *p* values. *Endog* was the only concordantly regulated and differentially expressed gene at the loci (---, no gene annotation).

| Haplotype block      | Probe ID          | Gene symbol         | Fold change  |              | P value         |                   |
|----------------------|-------------------|---------------------|--------------|--------------|-----------------|-------------------|
|                      |                   |                     | SHR vs WKY   | SHRSP vs WKY | SHR vs WKY      | SHRSP vs WKY      |
| 1: 8870982-9022111   | 1388019_at        | <i>Odf2</i>         | -1.32        | 1.00         | <0.05           | n.s.              |
|                      | 1368466_a_at      | <i>Odf2</i>         | 2.13         | -1.00        | <0.01           | n.s.              |
|                      | 1399142_at        | ---                 | 2.19         | 1.07         | <0.0001         | n.s.              |
|                      | 1393357_at        | <i>Gle1</i>         | -1.17        | 1.06         | n.s.            | n.s.              |
|                      | 1374690_at        | <i>Gle1</i>         | 1.41         | 1.18         | n.s.            | n.s.              |
|                      | 1397752_at        | ---                 | -1.26        | 1.02         | <0.01           | n.s.              |
|                      | 1370838_s_at      | <i>Spna2</i>        | 4.65         | 1.03         | <0.0001         | n.s.              |
|                      | 1379524_at        | <i>Wdr34</i>        | 1.87         | 1.21         | n.s.            | n.s.              |
| 2: 9126115-9195508   | 1389642_at        | ---                 | 3.11         | -1.05        | <0.01           | n.s.              |
|                      | <b>1389816_at</b> | <b><i>Endog</i></b> | <b>-1.75</b> | <b>-3.57</b> | <b>&lt;0.01</b> | <b>&lt;0.0001</b> |
|                      | 1373782_a_at      | <i>LOC499770</i>    | -1.39        | 1.01         | n.s.            | n.s.              |
|                      | 1373667_at        | <i>Ccbl1</i>        | 1.49         | -1.51        | <0.05           | <0.05             |
| 3: 9815960-9980785   | 1393913_at        | <i>RGD1311084</i>   | -1.38        | -1.00        | n.s.            | n.s.              |
|                      | 1381152_at        | <i>Mettl11a</i>     | 1.88         | -1.03        | <0.01           | n.s.              |
|                      | 1372185_at        | <i>Mettl11a</i>     | 2.53         | -1.23        | <0.01           | n.s.              |
|                      | 1371497_at        | <i>Asb6</i>         | 1.56         | 1.06         | n.s.            | n.s.              |
|                      | 1390772_at        | ---                 | -1.21        | 1.03         | n.s.            | n.s.              |
|                      | 1374477_at        | <i>Prrx2</i>        | 1.05         | 1.22         | n.s.            | n.s.              |
|                      | 1368015_at        | <i>Ptges</i>        | -2.29        | -1.08        | <0.01           | n.s.              |
|                      | 1368014_at        | <i>Ptges</i>        | -3.96        | -1.02        | <0.0001         | n.s.              |
| 4: 10039939-10197334 | 1378309_at        | <i>Usp20</i>        | 1.52         | 1.07         | n.s.            | n.s.              |
|                      | 1376656_at        | <i>Usp20</i>        | 1.85         | -1.03        | n.s.            | n.s.              |
|                      | 1377941_at        | ---                 | -1.65        | 1.01         | <0.0001         | n.s.              |
|                      | 1376784_at        | <i>Fnbp1</i>        | -1.39        | -1.10        | n.s.            | n.s.              |
|                      | 1372825_at        | <i>Fnbp1</i>        | 2.51         | -1.26        | <0.0001         | n.s.              |
|                      | 1373537_at        | ---                 | 1.03         | 1.03         | n.s.            | n.s.              |
|                      | 1377342_s_at      | <i>Fnbp1</i>        | -1.72        | 1.06         | <0.01           | n.s.              |
|                      | 1390682_at        | <i>Fnbp1</i>        | -4.95        | 1.09         | <0.0001         | n.s.              |
|                      | 1369471_at        | <i>Fnbp1</i>        | 1.12         | 1.18         | n.s.            | n.s.              |
|                      | 1395365_at        | ---                 | -1.54        | 1.09         | n.s.            | n.s.              |
|                      | 1379947_at        | ---                 | -2.13        | 1.05         | <0.0001         | n.s.              |
| 1375406_s_at         | <i>Fnbp1</i>      | -1.62               | -1.04        | <0.05        | n.s.            |                   |
| 5: 10697268-10944869 | 1381483_at        | ---                 | -1.03        | 1.06         | n.s.            | n.s.              |
|                      | 1382390_at        | ---                 | -1.06        | -1.08        | n.s.            | n.s.              |
|                      | 1393006_at        | ---                 | 1.11         | 1.51         | n.s.            | n.s.              |
|                      | 1375614_at        | <i>Prdm12</i>       | -2.28        | -1.04        | <0.01           | n.s.              |
|                      | 1379348_at        | <i>Exosc2</i>       | -1.05        | 1.04         | n.s.            | n.s.              |
|                      | 1371713_at        | <i>Abl1</i>         | 2.84         | -1.11        | <0.01           | n.s.              |
|                      | 1390677_at        | <i>Fibcd1</i>       | -1.12        | -1.08        | n.s.            | n.s.              |

<sup>1</sup> Petretto, E. *et al.* Integrated genomic approaches implicate osteoglycin (*Ogn*) in the regulation of left ventricular mass. *Nat Genet* **40**, 546-552, (2008).

<sup>2</sup> Monti, J. *et al.* Soluble epoxide hydrolase is a susceptibility factor for heart failure in a rat model of human disease. *Nat Genet* **40**, 529-537, (2008).

**Supplementary Table 2:** Gene Ontology annotation of the sub-cellular localisation of the protein products of transcripts in the *ENDOG*-containing module. The module (Figure 3 of manuscript) was identified following topological overlap measure (TOM) analysis of transcripts from the GEO dataset GSE5406. Terms that remained significant following Bonferroni-correction are shown with an associated false discovery rate (FDR).

| <b>Term (Cellular component)</b>                                                        | <b>Count</b> | <b>Fold Enrichment</b> | <b>Bonferroni-corrected <i>p</i> value</b> | <b>FDR</b> |
|-----------------------------------------------------------------------------------------|--------------|------------------------|--------------------------------------------|------------|
| GO:0005739~mitochondrion                                                                | 70           | 9                      | 2.35E-56                                   | 2.08E-55   |
| GO:0005743~mitochondrial inner membrane                                                 | 48           | 23                     | 4.69E-52                                   | 4.15E-51   |
| GO:0044429~mitochondrial part                                                           | 57           | 14                     | 9.12E-52                                   | 8.07E-51   |
| GO:0019866~organelle inner membrane                                                     | 48           | 21                     | 1.73E-50                                   | 1.53E-49   |
| GO:0005740~mitochondrial envelope                                                       | 51           | 18                     | 3.09E-50                                   | 2.74E-49   |
| GO:0031966~mitochondrial membrane                                                       | 50           | 19                     | 6.07E-50                                   | 5.37E-49   |
| GO:0044455~mitochondrial membrane part                                                  | 34           | 40                     | 2.81E-43                                   | 2.48E-42   |
| GO:0031967~organelle envelope                                                           | 51           | 12                     | 1.53E-41                                   | 1.35E-40   |
| GO:0031975~envelope                                                                     | 51           | 12                     | 1.79E-41                                   | 1.59E-40   |
| GO:0070469~respiratory chain                                                            | 27           | 53                     | 5.35E-37                                   | 4.73E-36   |
| GO:0005746~mitochondrial respiratory chain                                              | 24           | 55                     | 6.96E-33                                   | 6.16E-32   |
| GO:0031090~organelle membrane                                                           | 51           | 7                      | 2.08E-29                                   | 1.84E-28   |
| GO:0005747~mitochondrial respiratory chain complex I                                    | 20           | 70                     | 3.32E-29                                   | 2.93E-28   |
| GO:0045271~respiratory chain complex I                                                  | 20           | 70                     | 3.32E-29                                   | 2.93E-28   |
| GO:0030964~NADH dehydrogenase complex                                                   | 20           | 70                     | 3.32E-29                                   | 2.93E-28   |
| GO:0005753~mitochondrial proton-transporting ATP synthase complex                       | 8            | 62                     | 3.03E-09                                   | 2.68E-08   |
| GO:0045259~proton-transporting ATP synthase complex                                     | 8            | 56                     | 6.92E-09                                   | 6.12E-08   |
| GO:0045263~proton-transporting ATP synthase complex, coupling factor F(o)               | 7            | 69                     | 4.89E-08                                   | 4.33E-07   |
| GO:0033177~proton-transporting two-sector ATPase complex, proton-transporting domain    | 7            | 43                     | 1.25E-06                                   | 1.11E-05   |
| GO:0016469~proton-transporting two-sector ATPase complex                                | 8            | 26                     | 2.37E-06                                   | 2.10E-05   |
| GO:0005759~mitochondrial matrix                                                         | 13           | 8                      | 4.67E-06                                   | 4.13E-05   |
| GO:0031980~mitochondrial lumen                                                          | 13           | 8                      | 4.67E-06                                   | 4.13E-05   |
| GO:0000276~mitochondrial proton-transporting ATP synthase complex, coupling factor F(o) | 4            | 65                     | 3.16E-03                                   | 2.80E-02   |

**Supplementary Table 3:** Gene Ontology analysis of the biological processes associated with the *ENDOG*-containing module identified following topological overlap measure (TOM) analysis of transcripts from the GEO dataset GSE5406. Terms that remained significant following Bonferroni-correction ( $p < 0.05$ ) are shown with associated false discovery rates (FDRs).

| <b>Term (Biological process)</b>                                          | <b>Count</b> | <b>Fold Enrichment</b> | <b>Bonferroni-corrected <math>p</math> value</b> | <b>FDR</b> |
|---------------------------------------------------------------------------|--------------|------------------------|--------------------------------------------------|------------|
| GO:0006091~generation of precursor metabolites and energy                 | 40           | 21                     | 1.24E-39                                         | 3.34E-39   |
| GO:0006119~oxidative phosphorylation                                      | 29           | 48                     | 4.71E-38                                         | 1.27E-37   |
| GO:0045333~cellular respiration                                           | 26           | 44                     | 2.53E-32                                         | 6.82E-32   |
| GO:0022900~electron transport chain                                       | 27           | 39                     | 3.37E-32                                         | 9.09E-32   |
| GO:0042775~mitochondrial ATP synthesis coupled electron transport         | 22           | 64                     | 1.04E-30                                         | 2.79E-30   |
| GO:0042773~ATP synthesis coupled electron transport                       | 22           | 64                     | 1.04E-30                                         | 2.79E-30   |
| GO:0022904~respiratory electron transport chain                           | 22           | 56                     | 3.05E-29                                         | 8.22E-29   |
| GO:0015980~energy derivation by oxidation of organic compounds            | 26           | 29                     | 1.31E-27                                         | 3.54E-27   |
| GO:0006120~mitochondrial electron transport, NADH to ubiquinone           | 19           | 74                     | 2.80E-27                                         | 7.56E-27   |
| GO:0055114~oxidation reduction                                            | 35           | 9                      | 2.77E-21                                         | 7.47E-21   |
| GO:0016310~phosphorylation                                                | 30           | 6                      | 4.80E-13                                         | 1.29E-12   |
| GO:0006793~phosphorus metabolic process                                   | 31           | 5                      | 1.06E-11                                         | 2.84E-11   |
| GO:0006796~phosphate metabolic process                                    | 31           | 5                      | 1.06E-11                                         | 2.84E-11   |
| GO:0015992~proton transport                                               | 7            | 19                     | 9.47E-04                                         | 0.003      |
| GO:0009060~aerobic respiration                                            | 6            | 28                     | 0.001                                            | 0.003      |
| GO:0006818~hydrogen transport                                             | 7            | 18                     | 0.001                                            | 0.003      |
| GO:0015986~ATP synthesis coupled proton transport                         | 6            | 24                     | 0.002                                            | 0.006      |
| GO:0015985~energy coupled proton transport, down electrochemical gradient | 6            | 24                     | 0.002                                            | 0.006      |
| GO:0034220~ion transmembrane transport                                    | 6            | 20                     | 0.006                                            | 0.016      |
| GO:0006754~ATP biosynthetic process                                       | 7            | 13                     | 0.009                                            | 0.023      |
| GO:0032981~mitochondrial respiratory chain complex I assembly             | 4            | 65                     | 0.013                                            | 0.036      |
| GO:0010257~NADH dehydrogenase complex assembly                            | 4            | 65                     | 0.013                                            | 0.036      |
| GO:0009206~purine ribonucleoside triphosphate biosynthetic process        | 7            | 12                     | 0.015                                            | 0.040      |
| GO:0009145~purine nucleoside triphosphate biosynthetic process            | 7            | 12                     | 0.016                                            | 0.043      |
| GO:0009201~ribonucleoside triphosphate biosynthetic process               | 7            | 12                     | 0.016                                            | 0.043      |
| GO:0009142~nucleoside triphosphate biosynthetic process                   | 7            | 11                     | 0.019                                            | 0.051      |
| GO:0046034~ATP metabolic process                                          | 7            | 11                     | 0.022                                            | 0.060      |
| GO:0033108~mitochondrial respiratory chain complex assembly               | 4            | 54                     | 0.024                                            | 0.066      |
| GO:0009152~purine ribonucleotide biosynthetic process                     | 7            | 10                     | 0.040                                            | 0.110      |
| GO:0009205~purine ribonucleoside triphosphate metabolic process           | 7            | 10                     | 0.040                                            | 0.110      |
| GO:0009199~ribonucleoside triphosphate metabolic process                  | 7            | 10                     | 0.042                                            | 0.115      |

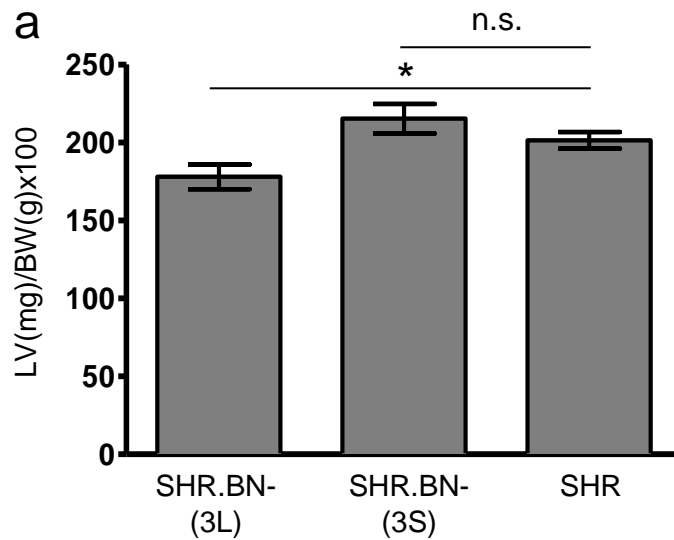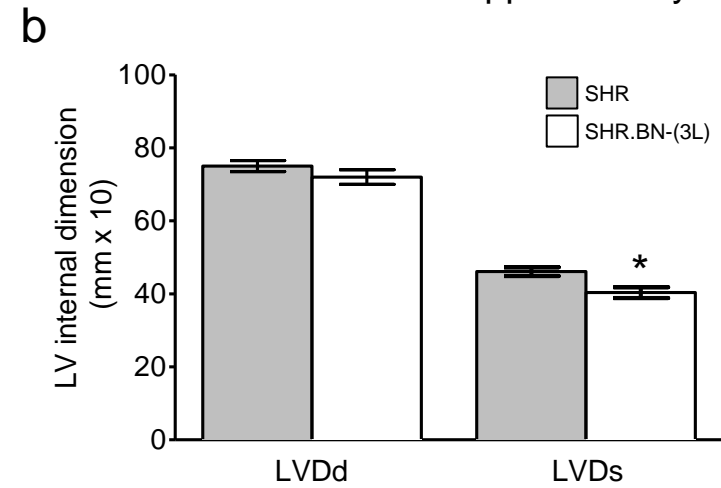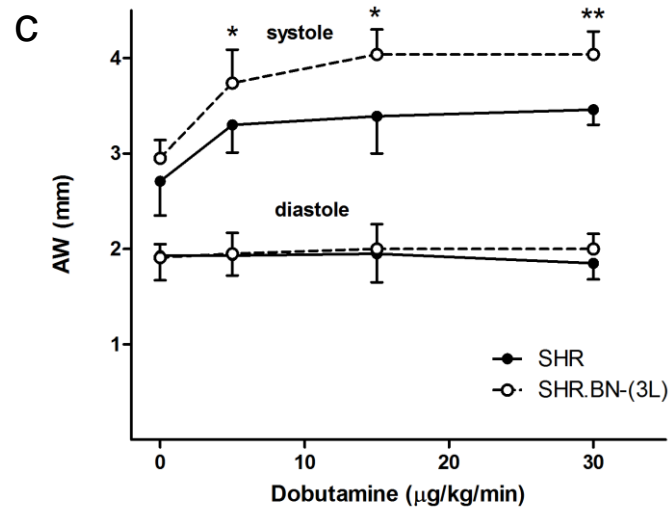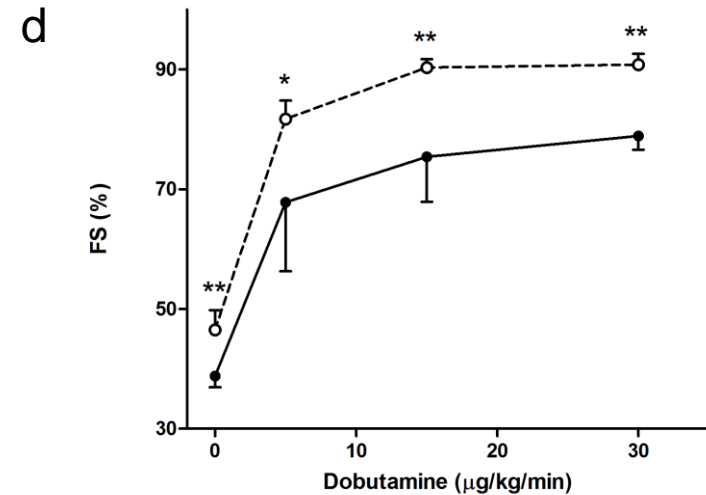

**Supplementary Figure 1. SHR.BN-(3L) has lower LVM and better cardiac performance than the SHR.** **a**, *Ex vivo* left ventricular weight (LV) normalised to body weight (BW); there was no difference in RV weight (data not shown). **b**, Left ventricular chamber dimension during diastole (LVDd) and systole (LVDs). **c** and **d** Dobutamine stress echocardiogram. **c**, Systolic and diastolic thickness of the LV anterior wall (AW) in response to increasing dobutamine dose. **d**, Fractional shortening (FS) of the LV in response to increasing dobutamine dose. Data are represented as means  $\pm$ s.e.m. (a and b) and  $\pm$ s.d. (c and d). \*,  $P < 0.05$ , \*\*,  $P < 0.01$  ( $n \geq 6$  per genotype).

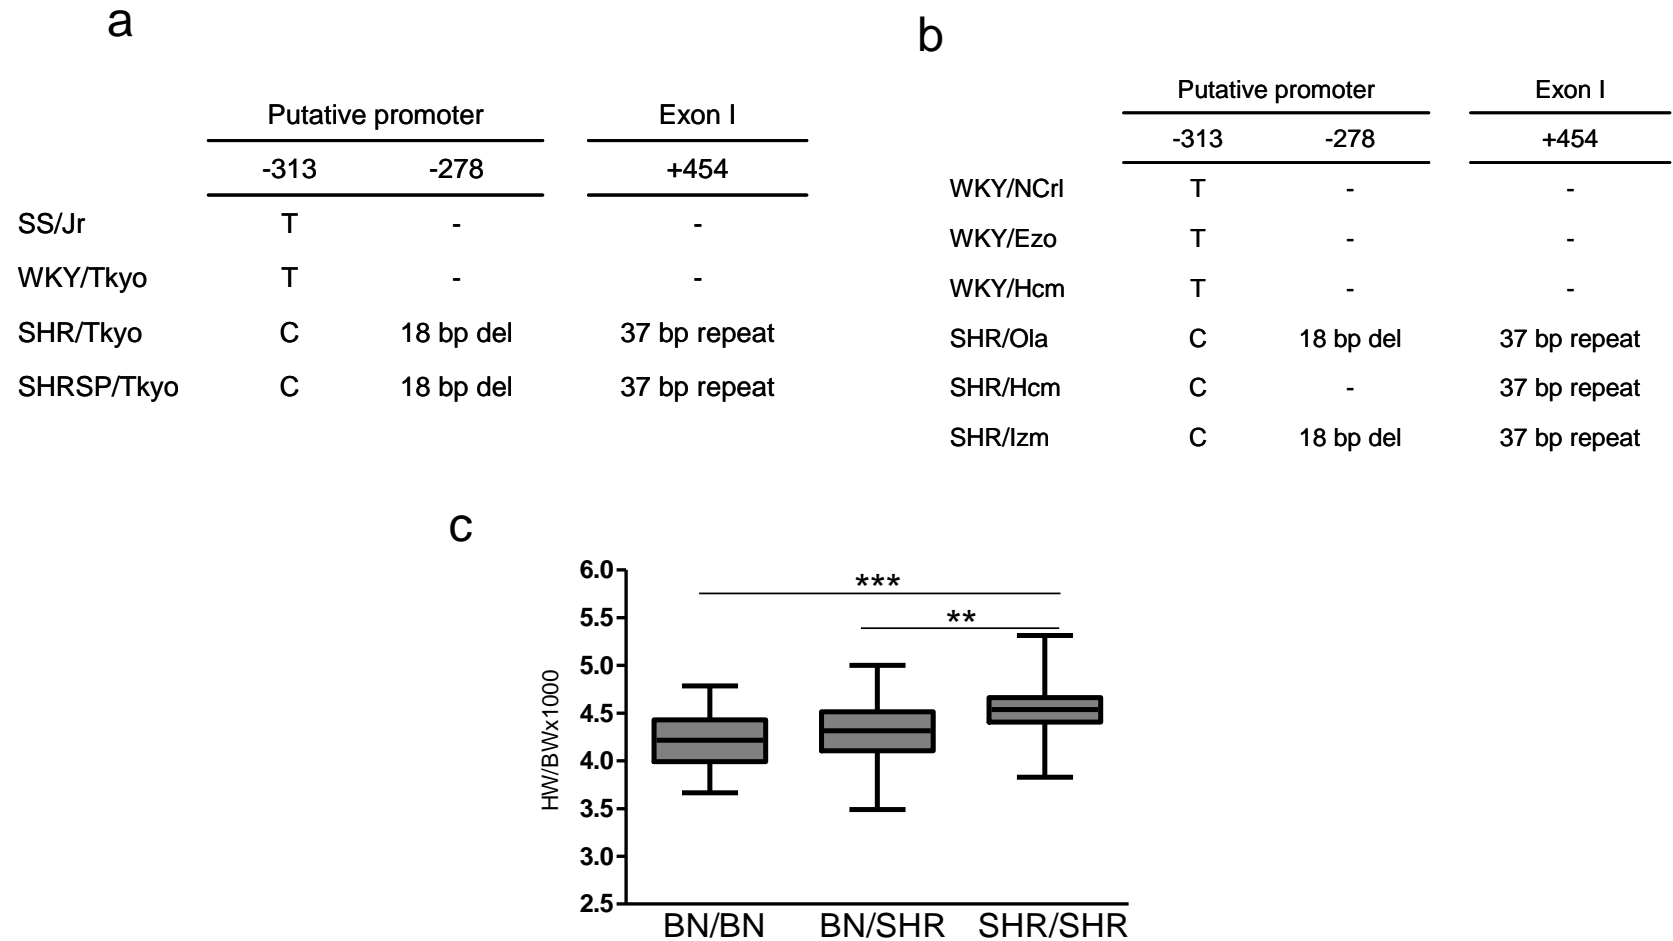

**Supplementary Figure 2. *Endog* sequence variants in rat strains and association of an exon 1 indel with HW.** **a**, Variants in rat strains used in previous studies to map the chromosome 3 LVM QTL. **b**, Variants in additional WKY and SHR sub-strains identifies an SHR-specific 37bp repeat in the SHR and SHR-derived strains. Numbering refers to nucleotide position relative to the transcription start site (TSS). The promoter was defined as the 2000 bps immediately upstream of the TSS. **c**, Association of the SHR-specific *Endog* indel with indexed HW in the BN x SHR  $F_2$  population (box, inter-quartile range; line, median; whiskers, 5<sup>th</sup>-95<sup>th</sup> percentile).

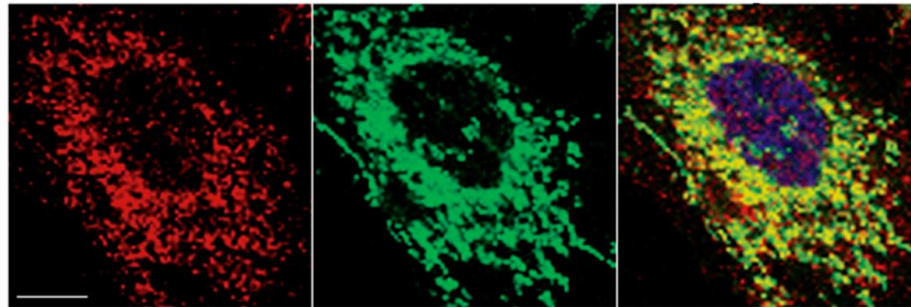

**Supplementary Figure 3. Immunofluorescence confocal micrographs of Endog co-localisation with mitochondria in cardiomyocytes.** Left, Endog labelled with a rabbit polyclonal antibody and Alexa568-conjugated secondary antibody; centre, mitochondria labelled with Mitotracker Green; right, merged image with co-localisation evidenced by yellow areas and nuclei counterstained with DAPI. Scale bar = 5 microns.

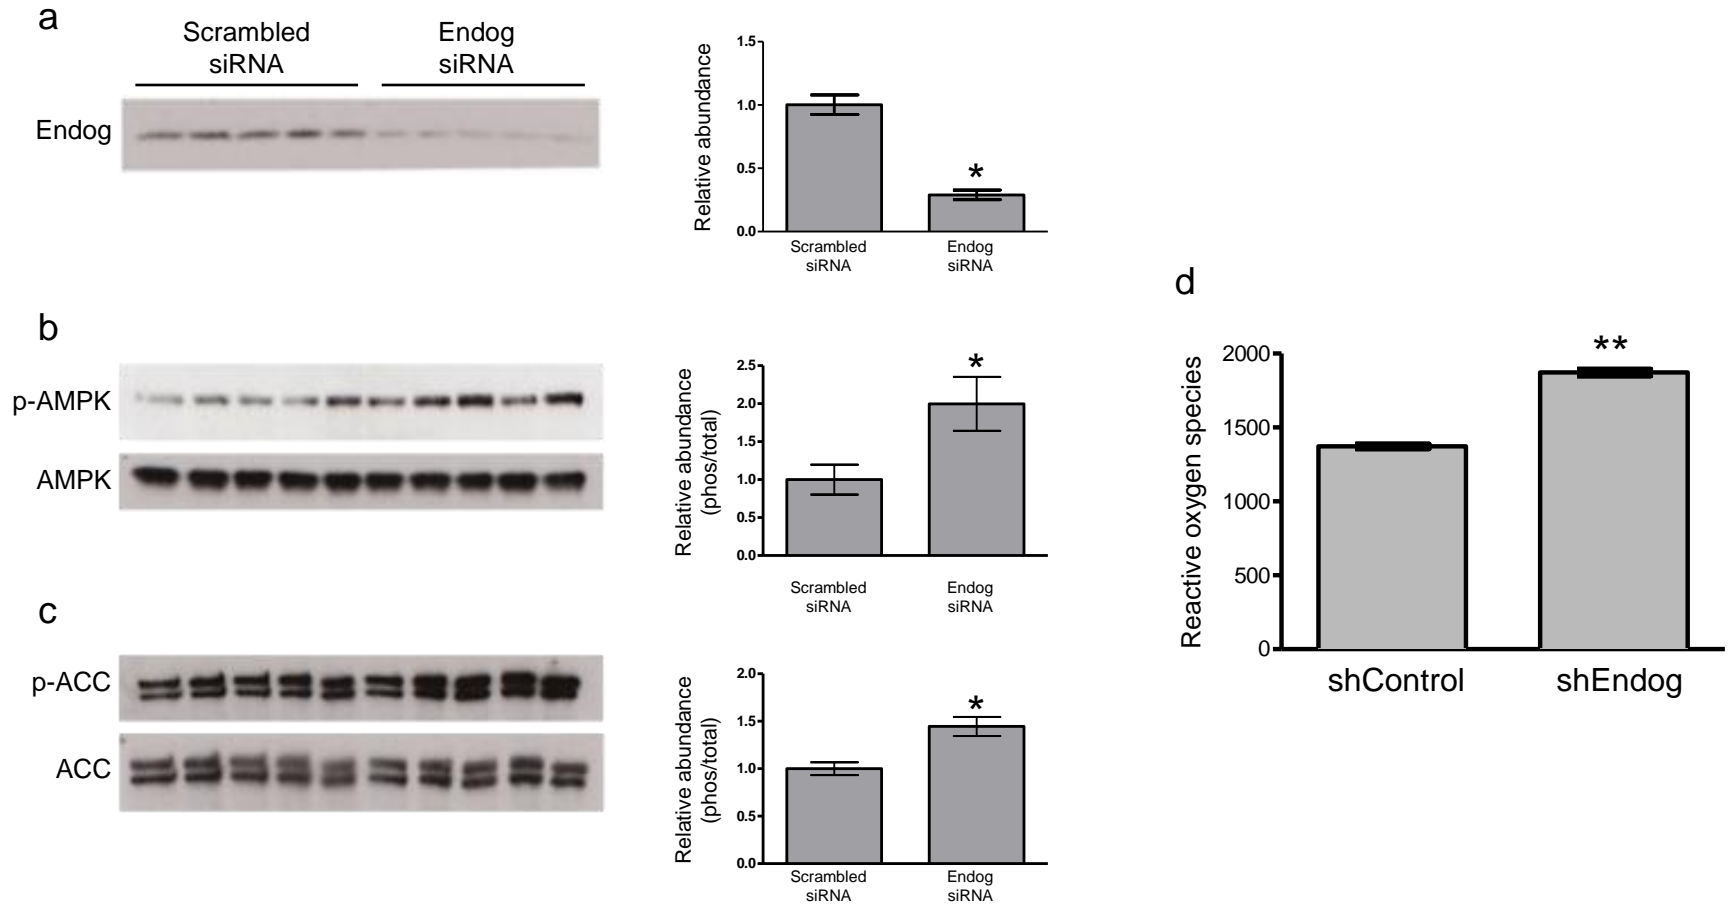

**Supplementary Figure 4. Knockdown of *Endog* in primary cultures of neonatal rat ventricular cardiac myocytes activates AMPK with resultant ACC phosphorylation and induces reactive oxygen species (ROS) production.** **a**, Immunoblot of Endog expression (left panel) and quantification of expression differences (right panel). **b**, Immunoblot of phospho-(Thr 172)-AMPK (p-AMPK) and total AMPK (left panel) and quantification of expression differences in p-AMPK normalised to total AMPK (right panel). **c**, Immunoblot of phospho-(Ser 79)-ACC (p-ACC) and total ACC (left panel) and quantification of expression differences in p-ACC normalised to total ACC (right panel). **a-c** Graphs, y axis units are arbitrary optical units. The experiment was repeated with similar results. **d**, Fluorescence-based quantification of ROS production in cardiomyocytes treated with shControl or sh*Endog*. Bars represent means±s.e.m. \*,  $P<0.05$ , \*\*,  $P<0.01$ .

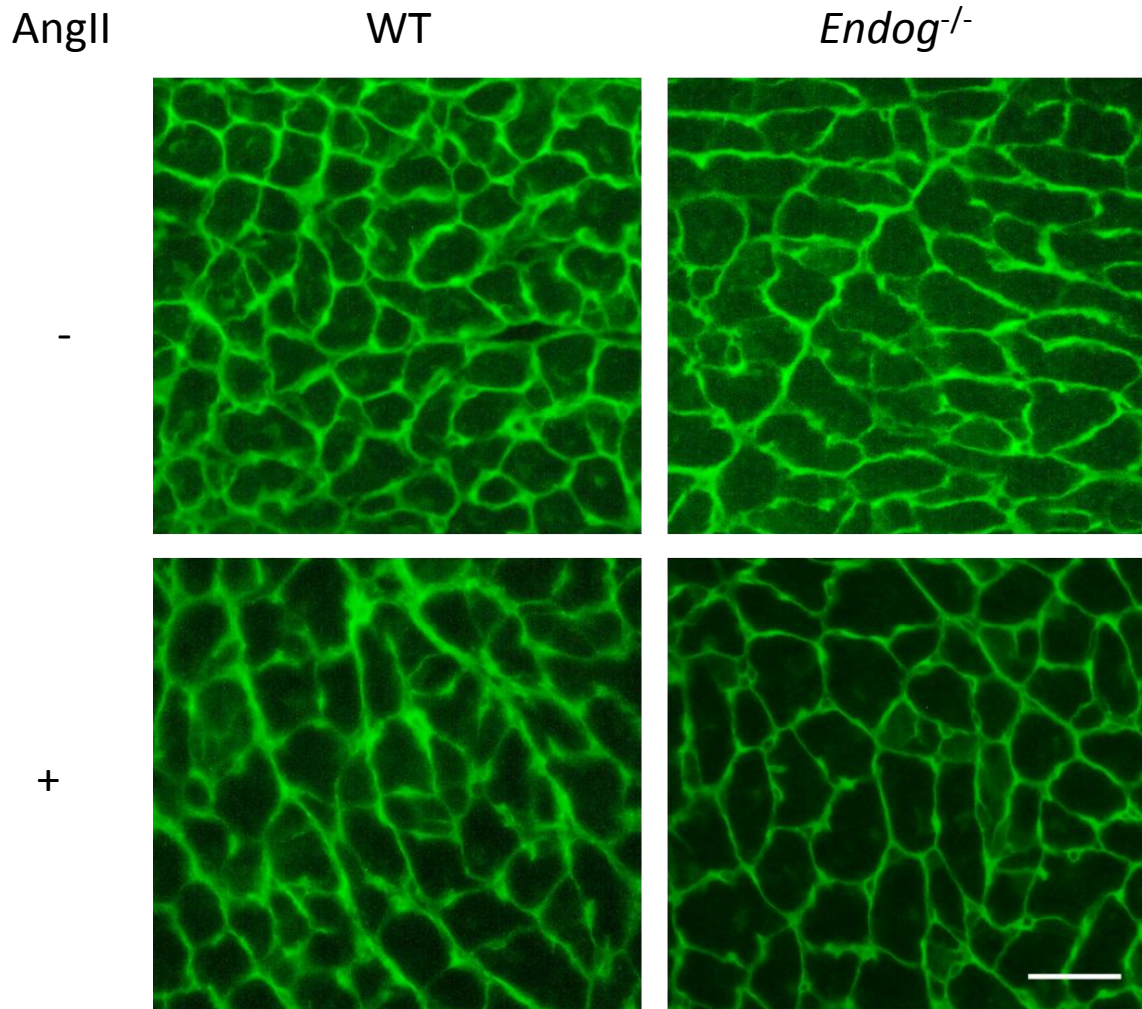

**Supplementary figure 5. *Endog*<sup>-/-</sup> mice have increased cardiomyocyte cross-sectional area at baseline and following angiotensin II (AngII) stimulation.** Representative fluorescence photomicrographs of left ventricular sections from *Endog*<sup>-/-</sup> and wildtype (WT) mice at baseline (-) and following AngII-induced hypertrophic stimulation (+). Sections were stained with WGA-FITC (10 µg/ml) to delineate the cell membrane. Scale bar: 50 microns.



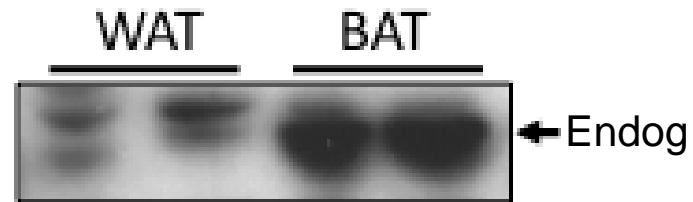

**Supplementary figure 6. Elevated Endog protein expression in brown adipose tissue.** Protein lysates from murine brown adipose tissue (BAT, n=2) and white adipose tissue (WAT, n=2) were analysed for Endog expression by immunoblotting. Equivalent loading was confirmed via Ponceau Red staining (not shown) (Endog: ~30kDa).

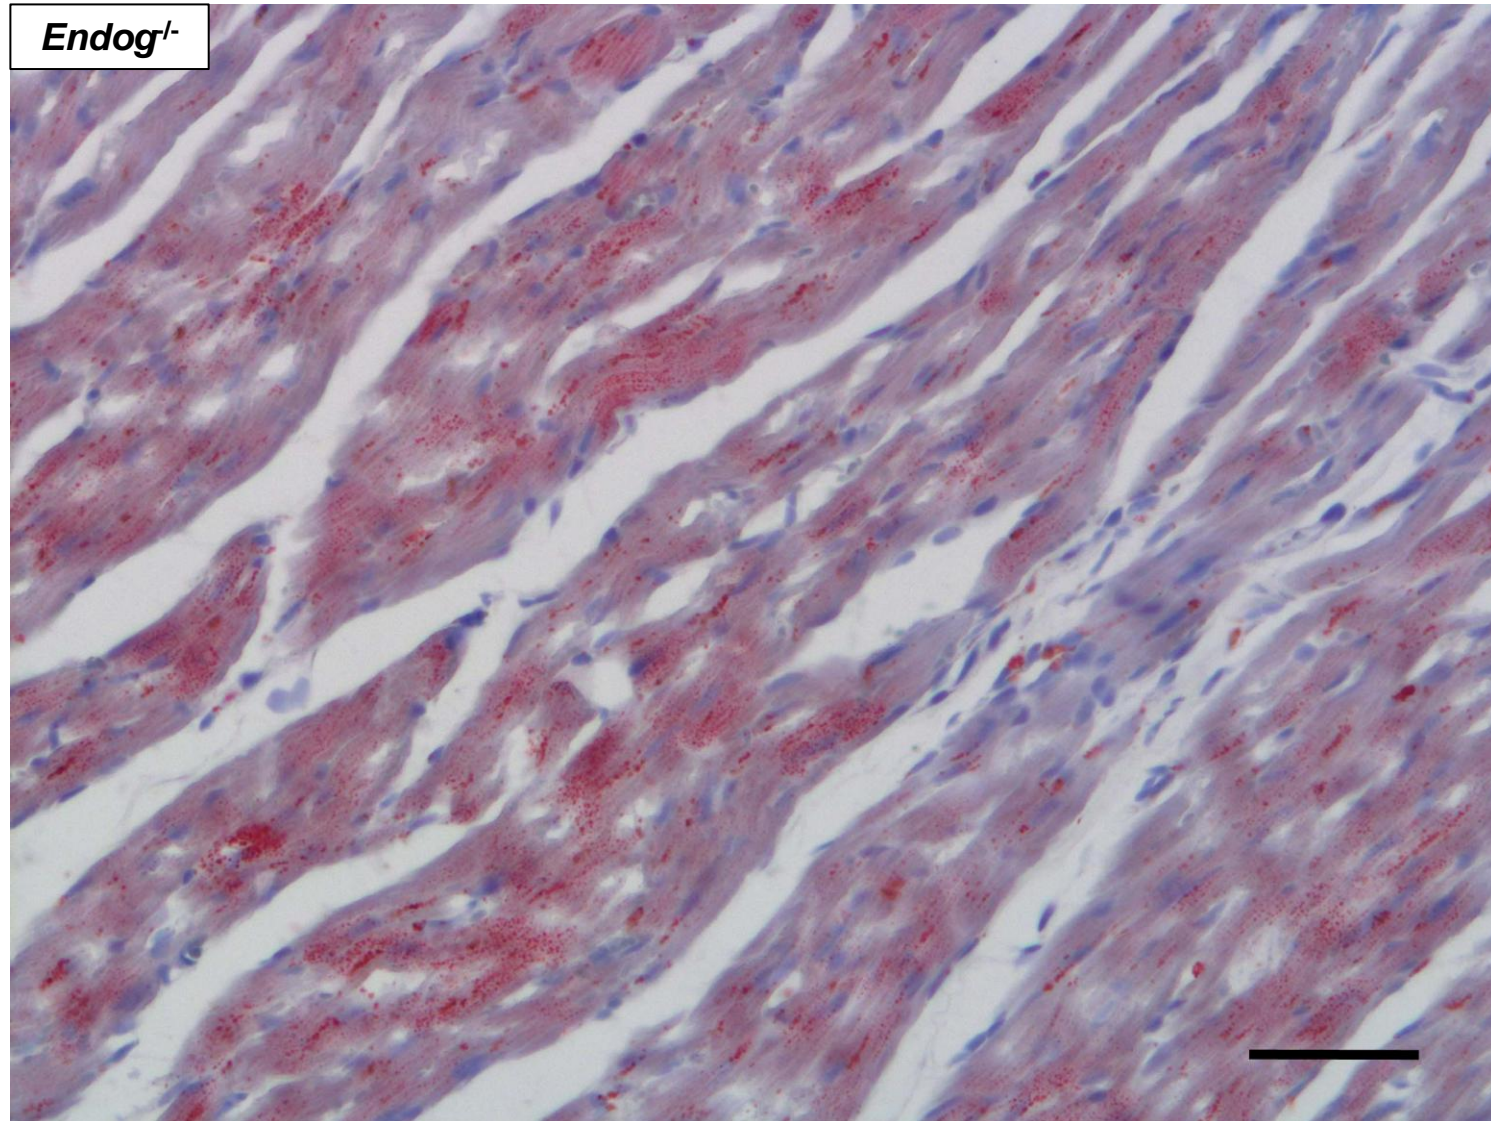

**Supplementary Figure 7a. High resolution oil red O staining for lipid in a left ventricular section from a 12-month old representative *Endog<sup>1-/-</sup>* mouse (x40). Nuclei are stained with hematoxylin and appear blue. Scale bar=50 microns.**

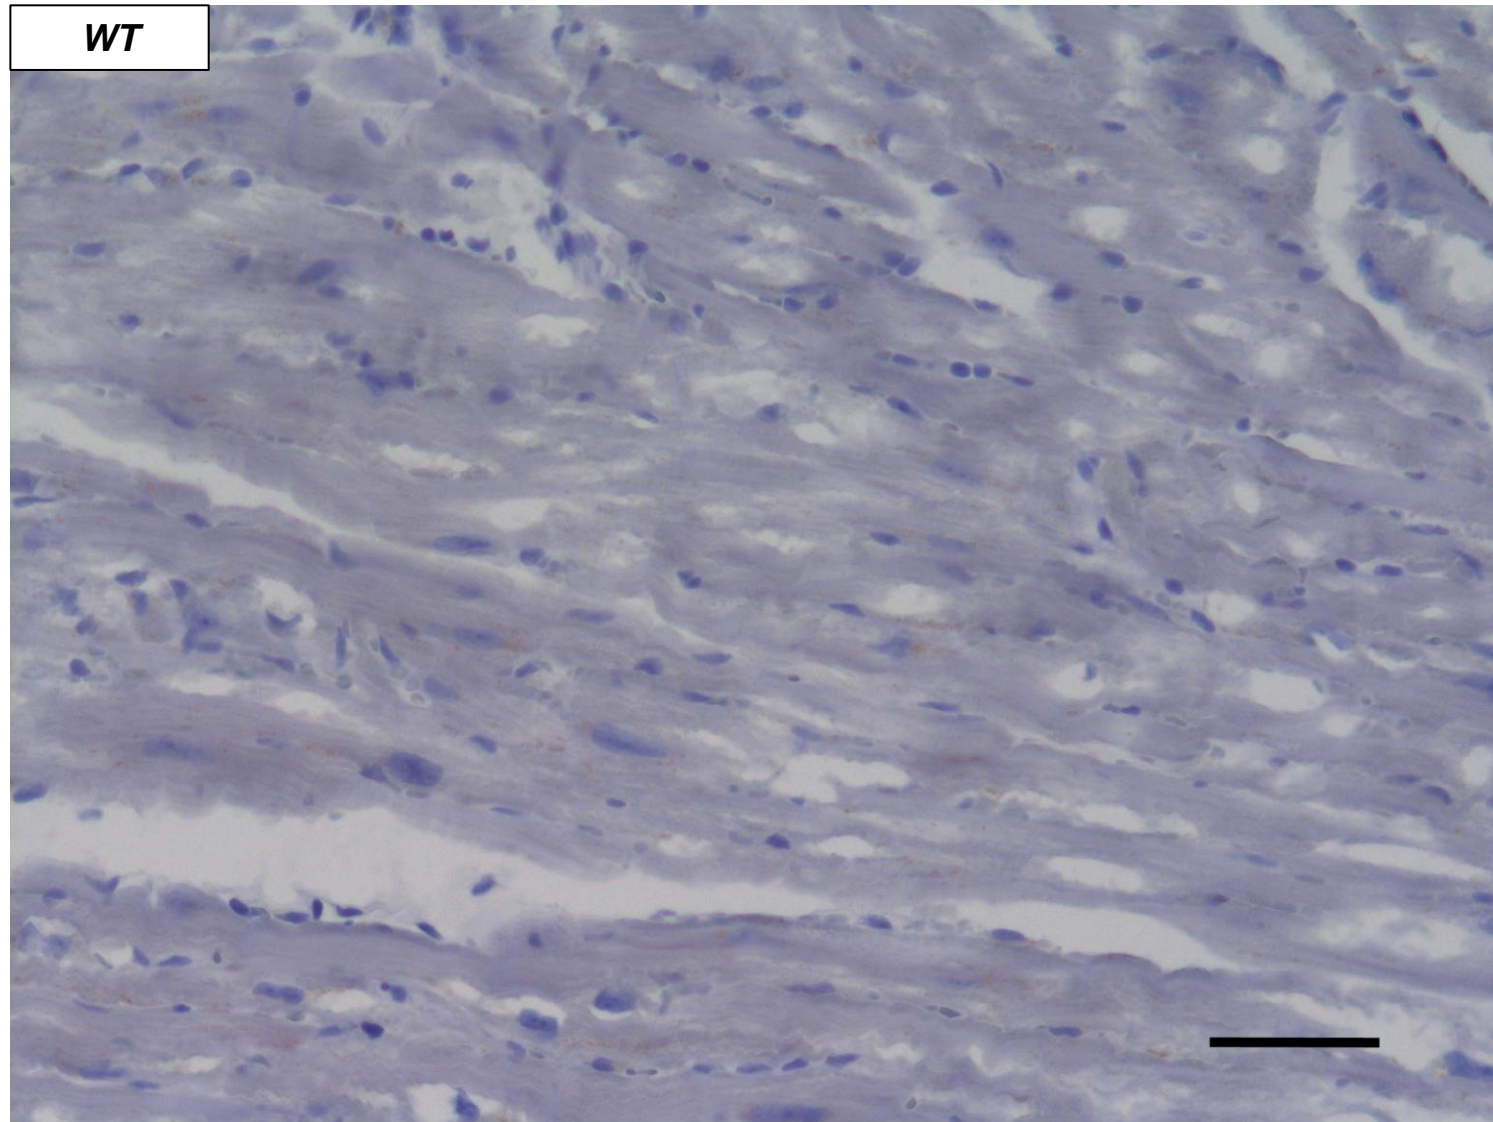

**Supplementary Figure 7b. High resolution oil red O staining for lipid in left a ventricular section from a 12-month old representative wildtype mouse (x40). Nuclei are stained with hematoxylin and appear blue. Scale bar=50 microns.**

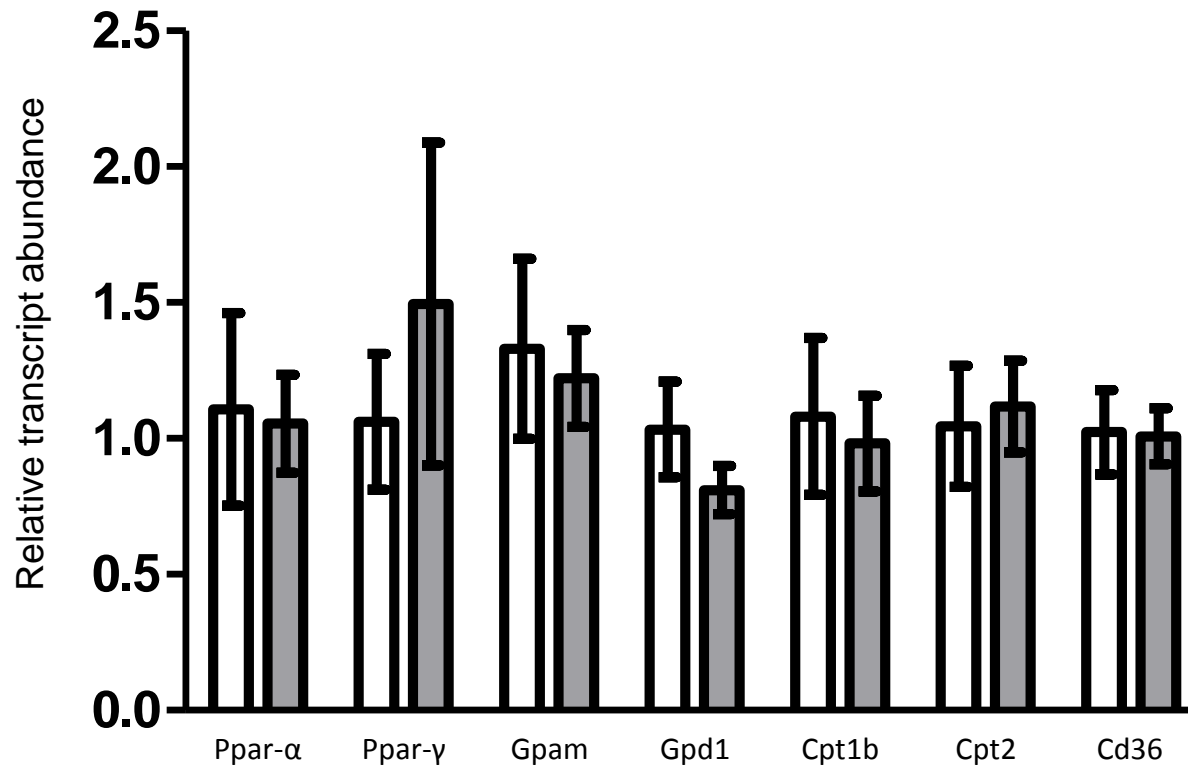

**Supplementary Figure 8.** QPCR analysis of lipid metabolism genes in hearts of WT and *Endog*<sup>-/-</sup> mice (n=3). Data are presented as means  $\pm$  s.e.m.

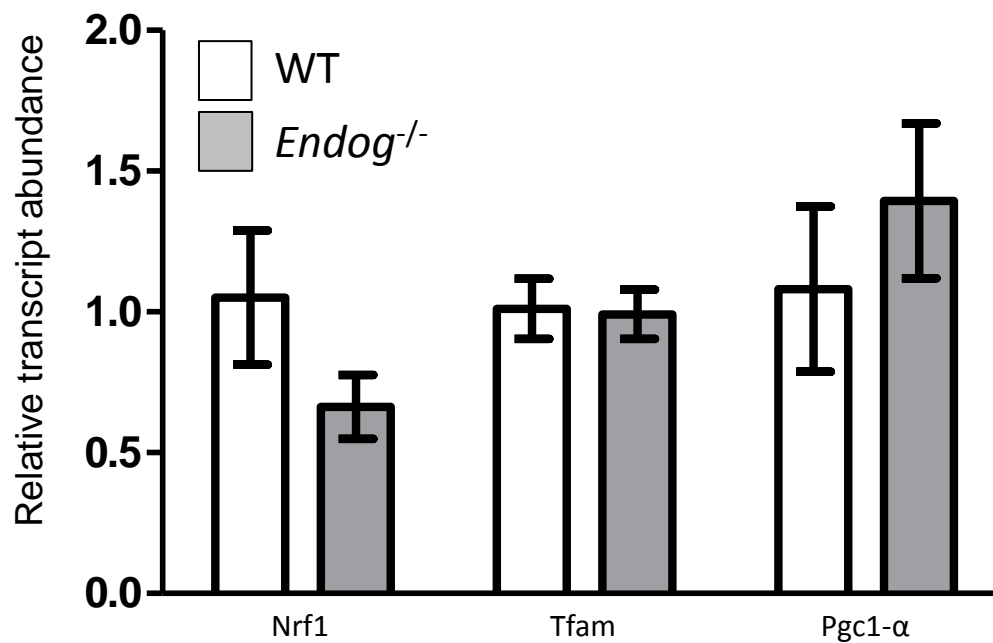

**Supplementary Figure 9. QPCR analysis of mitochondrial biogenesis genes in hearts of WT and *Endog*<sup>-/-</sup> mice (n=3). Data are presented as means ± s.e.m.**

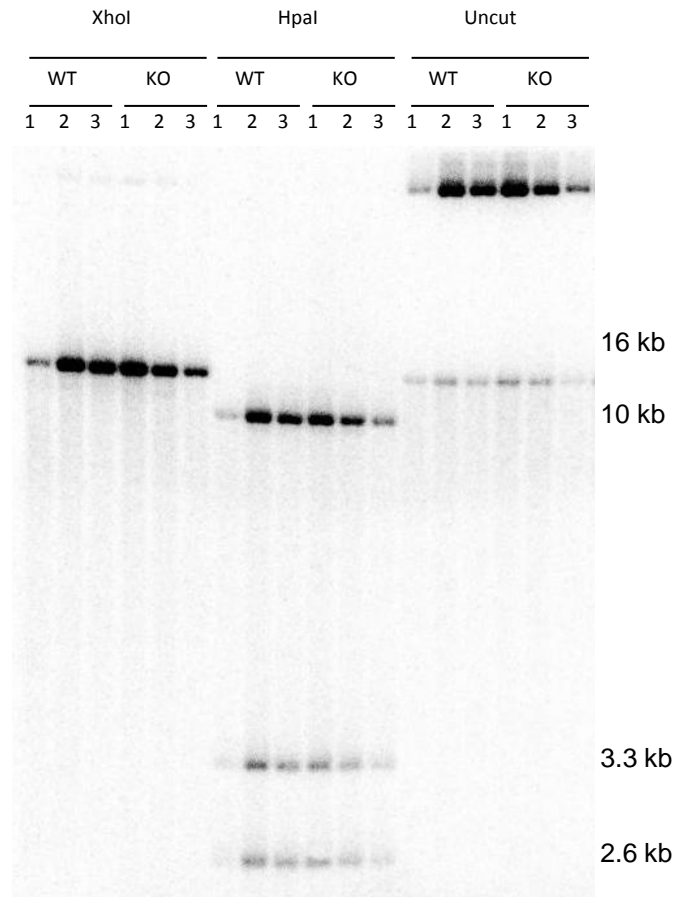

**Supplementary Figure 10. Southern blot analysis of *Endog*<sup>-/-</sup> heart mitochondrial DNA.** Total mtDNA from *Endog*<sup>-/-</sup> (n=3) and wildtype (n=3) mouse heart was digested with the indicated restriction enzymes before being electrophoresed on an agarose gel, transferred to a nylon membrane and incubated with a <sup>32</sup>P-labeled mouse mtDNA-specific probe (described in Supplementary Information). Values to the right denote fragment length in kilobases.



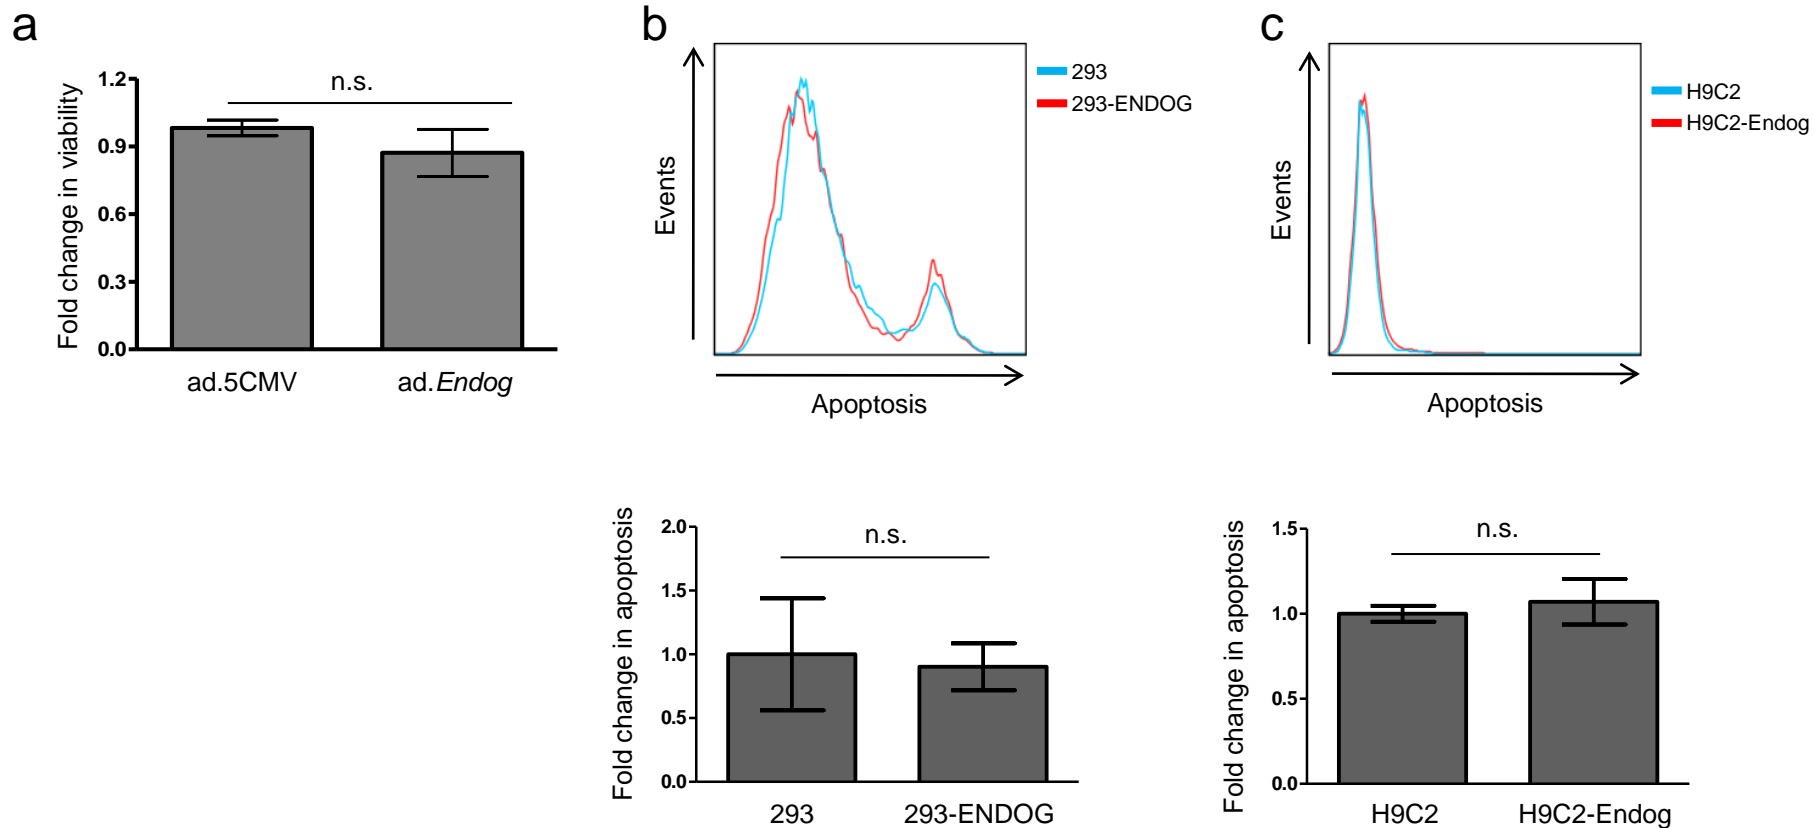

**Supplementary Figure 11. Acute and chronic over-expression of EndoG has no effect on apoptosis or necrosis.** (a) Myocytes were infected with *ad.Endog* (n=3) or a control virus at a concentration of 2 pfu/cell and cultured for 4 days to allow protein expression. Viability was assessed via spectrophotometric measurement of formazan (570 nm). (b) HEK293 cultures stably expressing *ENDO*G (n=3) were stained with AnnexinV and analysed by FACS. (c) H9C2 cells infected with *ad.Endog* (n=3) at a concentration of 2 pfu/cell were stained with AnnexinV and analysed by FACS. In **b** and **c**, top panels are histograms from one experiment and are representative of 3 biological replicates and bottom panels display mean AnnexinV signal  $\pm$  s.e.m and are expressed relative to control.
